# Supplementary material
Source: Springer Nature journal article supplement (https://www.springermedizin.de/resource/supplementary/12889_2010_2997_MOESM4_ESM.pdf/9487838)

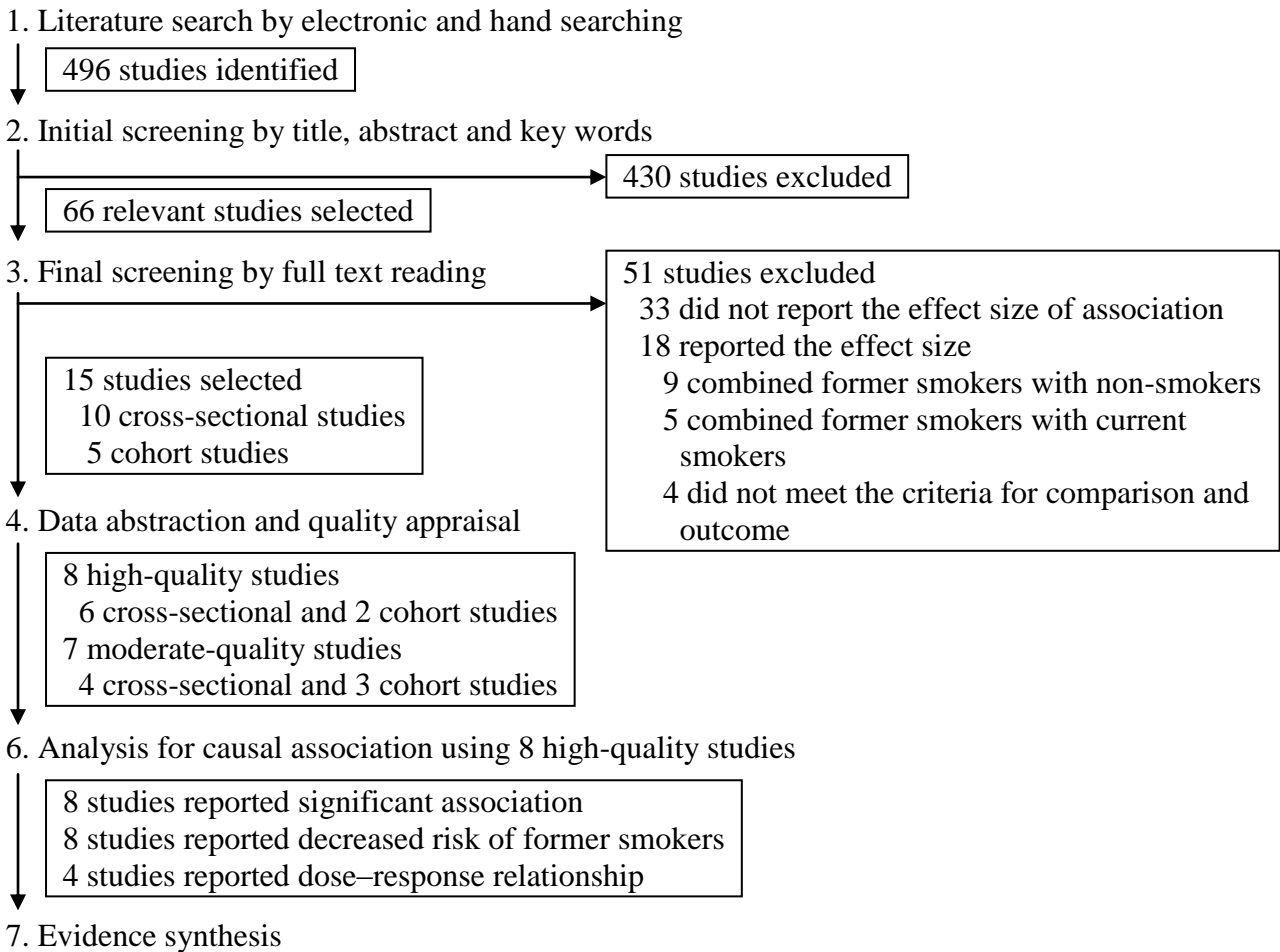

Supplement: MOESM4 [file 9487838]
